# Supplementary material
Source: publisher site journal article supplement (https://www.dovepress.com/article/287163)
Supplement: Supplementary file 1 [file get_supplementary_file.php]

**Supplementary table 1.** Associations between genetic risk for diurnal preference and mean standard scores for each sleep domain, in FinnBrain cohort

| **FINNBRAIN COHORT** |  | **PRSBestFit** | | | **PRS10kBest** | | |
| --- | --- | --- | --- | --- | --- | --- | --- |
| **Sleep variables** | **N** | *R2* | *β* | *p* | *R2* | *β* | *p* |
| Sleep-onset latency | 1502 | 0.012 | 0.013 | 0.597 | **0.014** | **-0.049** | **0.034** |
| Bedtime | 1502 | 0.013 | 0.033 | 0.179 | 0.013 | 0.025 | 0.323 |

**PRSBestFit=**Polygenetic risk score for eveningness; **PRS10kBest=**Polygenetic risk score for morningness

**Supplementary table 2.** Associations between genetic risk for diurnal preference and sleep-onset latency, at each time point, in CHILD-SLEEP and FinnBrain cohorts

| **CHILD-SLEEP COHORT** | | | | | | | | |
| --- | --- | --- | --- | --- | --- | --- | --- | --- |
| **Sleep variable** | **Time point** | | PRSBestFit | | | PRS10kBest | | |
| **ISQ sleep-onset latency** |  | **N** | *R2* | *β* | *p* | *R2* | *β* | *p* |
| 3 months | 1165 | **0.022** | **0.081** | **0.007** | **0.021** | **-0.077** | **0.008** |
| 8 months | 1094 | 0.004 | 0.019 | 0.551 | 0.004 | -0.002 | 0.940 |
| 18 months | 983 | **0.020** | **0.087** | **0.009** | **0.018** | **-0.066** | **0.037** |
| 24 months | 801 | 0.024 | 0.062 | 0.093 | **0.025** | **-0.069** | **0.050** |
| **BISQ sleep-onset latency** | 3 months | 1124 | **0.028** | **0.087** | **0.005** | 0.024 | -0.055 | 0.066 |
| 8 months | 1082 | 0.006 | 0.025 | 0.440 | 0.005 | -0.002 | 0.951 |
| 18 months | 938 | **0.028** | **0.096** | **0.005** | **0.025** | **-0.073** | **0.026** |
| 24 months | 771 | 0.019 | 0.070 | 0.056 | 0.018 | -0.061 | 0.092 |
| **FinnBrain COHORT** | | | | | | | | |
| **Sleep variable** | **Time point** | | PRSBestFit | | | PRS10kBest | | |
| **BISQ sleep-onset latency** |  | **N** | *R2* | *β* | *p* | *R2* | *β* | *p* |
| 6 months | 1482 | 0.011 | 0.012 | 0.650 | 0.012 | -0.042 | 0.105 |
| 12 months | 1208 | 0.015 | 0.040 | 0.164 | **0.017** | **-0.061** | **0.035** |
| 24 months | 994 | 0.010 | -0.007 | 0.828 | 0.011 | -0.036 | 0.257 |

**ISQ=**Infant Sleep Questionnaire; **BISQ=**Brief Infant Sleep Questionnaire; **PRSBestFit=**Polygenic risk score for eveningness; **PRS10kBest=**Polygenic risk score for morningnes

**Supplementary table 3**. Associations between genetic risk for diurnal preference and sleep-onset latency, at eight months, in CHILD-SLEEP, in the group of children with actigraphy recording at eight months

| **CHILD-SLEEP COHORT*** | | | | | | | |
| --- | --- | --- | --- | --- | --- | --- | --- |
|  |  | PRSBestFit | | | PRS10kBest | | |
|  | **N** | *R2* | *β* | *p* | *R2* | *β* | *p* |
| **ISQ sleep-onset latency, 8 months** | 304 | 0.016 | 0.061 | 0.292 | 0.014 | 0.032 | 0.579 |
| **BISQ sleep-onset latency, 8 months** | 304 | 0.012 | 0.003 | 0.959 | 0.013 | 0.043 | 0.454 |

**ISQ=**Infant Sleep Questionnaire; **BISQ=**Brief Infant Sleep Questionnaire; **PRSBestFit=**Polygenic risk score for eveningness; **PRS10kBest=**Polygenic risk score for morningnes

*For this analyses, only the group of children with actigraphy recording at the age of eight months was selected
